# Supplementary material
Source: PubMed Central journal article supplement (PMC5010011)
Supplement: NIHMS793143-supplement-1.pdf [file NIHMS793143-supplement-1.pdf]

Supplementary Material for

**The binary toxin CDT enhances *Clostridium difficile* virulence by suppressing protective colonic eosinophilia**

Carrie A. Cowardin, Erica L. Buonomo, Mahmoud M. Saleh, Madeline G. Wilson, Stacey L. Burgess, Sarah A. Kuehne, Carsten Schwan, Anna M. Eichhoff, Friedrich Koch-Nolte, Dena Lyras, Klaus Aktories, Nigel P. Minton, William A. Petri, Jr.\*

\*Correspondence to: wap3g@virginia.edu

**Supplementary Figure 1: *C. difficile* burden, Toxins A and B, translocation of commensals and histology scoring.**

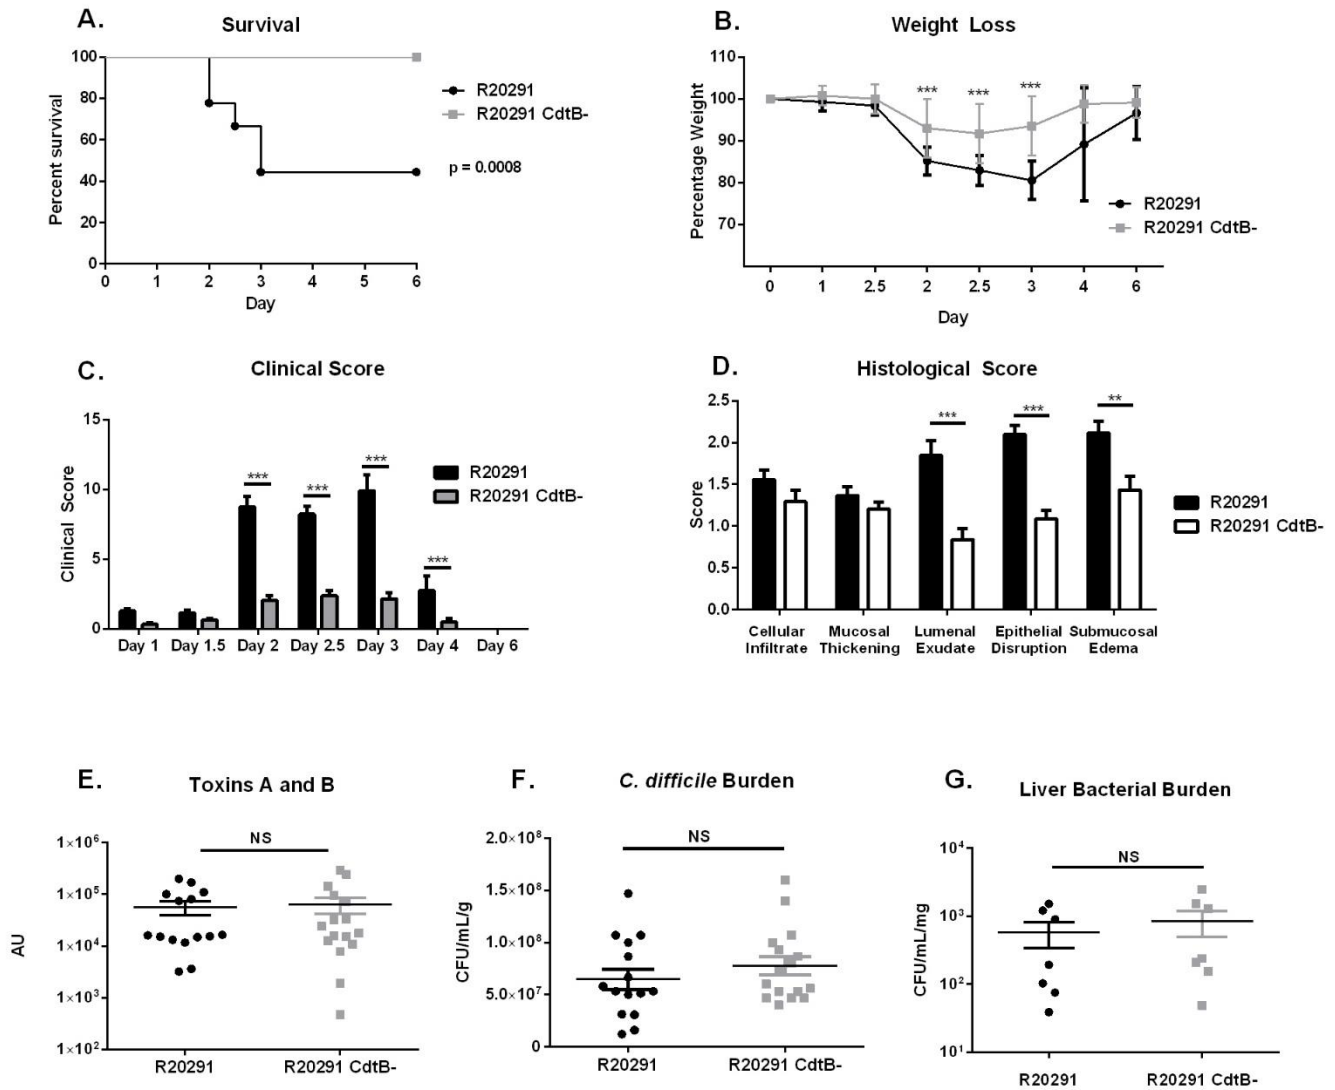

(A-C) 8 week old C57BL/6J mice underwent an antibiotic regimen prior to infection with  $10^7$  CFU of vegetative *C. difficile* strain R20291 or the isogenic mutant lacking the binding domain of CDT (R20291 CdtB-) (data shown combined from three independent experiments, n=24). (D) Mice were sacrificed on day 2 of infection and cecal sections were fixed in Bouin's solution for 18 hours before undergoing paraffin embedding, sectioning and hematoxylin & eosin staining.

Samples were scored blinded based on 5 parameters (submucosal edema, inflammatory infiltrate, epithelial disruption, luminal exudate and mucosal thickening). **(E)** Mice were sacrificed on day 3 and Toxins A and B in the cecal contents were assessed via ELISA. **(F)** Cecal *C. difficile* burden was enumerated anaerobically on Brain-Heart Infusion agar. **(G)** Total liver bacterial burden was determined by plating liver homogenate on non-selective BHI and incubating aerobically overnight. Data shown combined from two independent experiments (n=13 in **D**, n=15 in **E-F**, and n=7 in **G**). \* = p value < 0.05, \*\* = p value < 0.01, \*\*\* = p value < 0.001 by Kaplan-Meier Analysis **(A)** or Mann-Whitney test **(B-G)**. NS = not significant. Error bars shown represent S.D. **(B)** or S.E.M. **(C-G)**.

**Supplementary Figure 2: Eosinophil gating strategy and depletion with anti-SiglecF.**

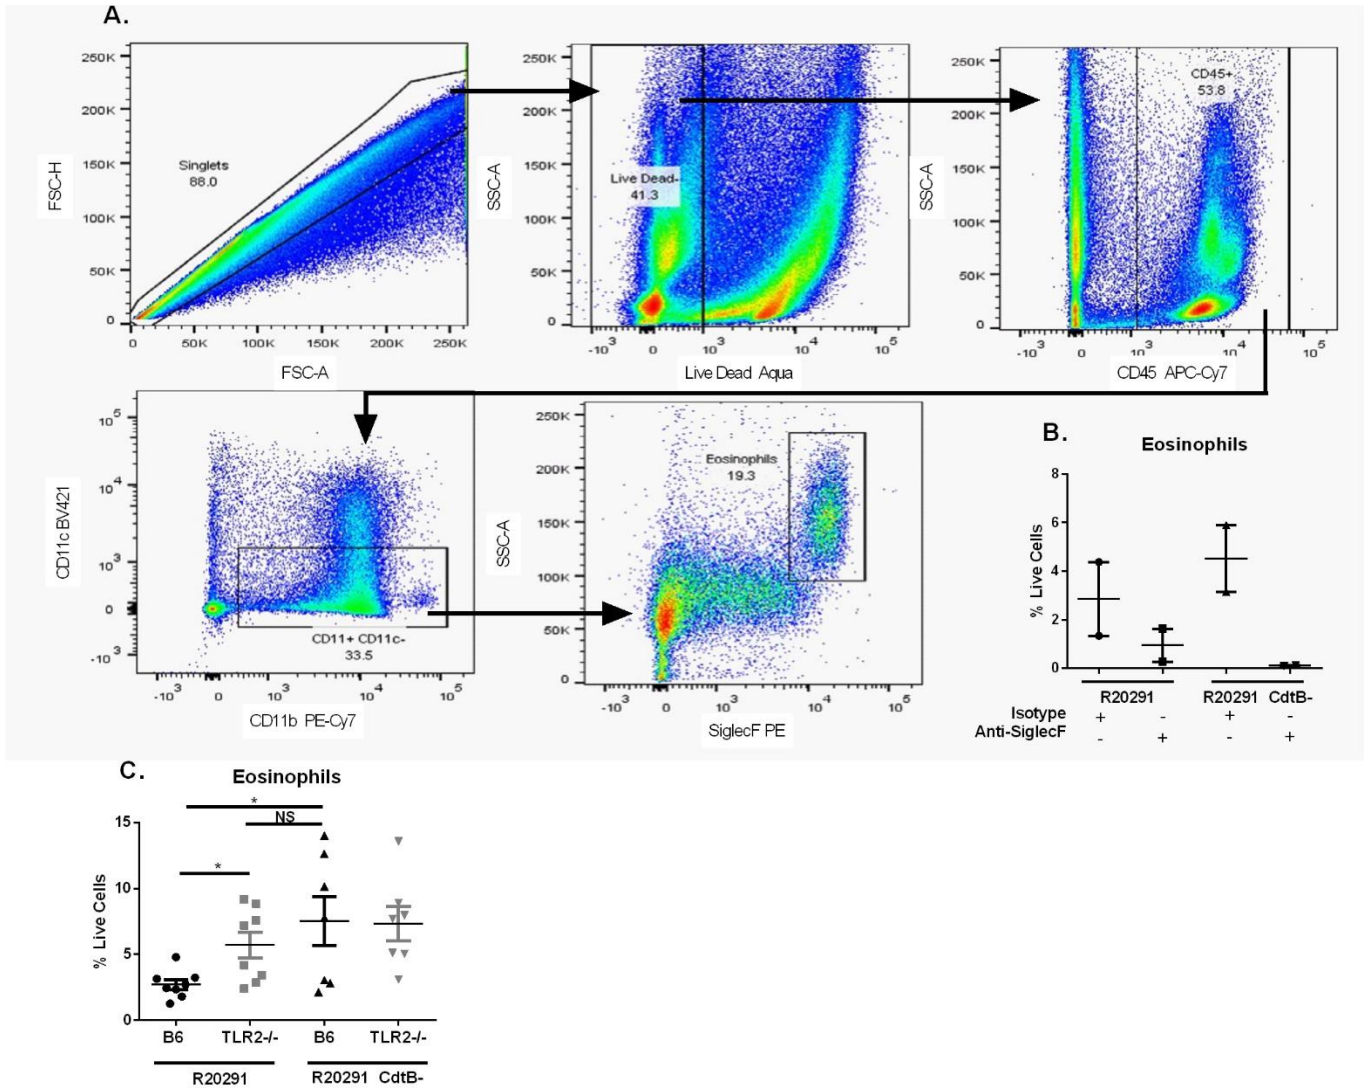

(A) Mice were sacrificed on day 3 of infection and colonic eosinophils were measured by flow cytometry following tissue processing and staining. The gating strategy identified singlets, Live dead negative cells, CD45+ cells, CD11b+ CD11c- and SiglecF+ side scatter high populations as eosinophils. Data shown are representative of 2 independent experiments. (B) Eosinophil depletion was quantified on day 3 of infection in mice treated with anti-SiglecF or an isotype control antibody (two IP injections of 40 ug each on the day before and the day following infection) infected with R20291 or R20291 CdtB- (n=2). (C) TLR2<sup>-/-</sup> mice or C57BL/6J mice were infected

with wild-type R20291 or the isogenic CDT mutant R20291 CdtB- and were sacrificed on day 3 of infection. Colonic eosinophils (CD45<sup>+</sup> CD11b<sup>+</sup> SiglecF<sup>+</sup> SSC<sup>hi</sup>) were measured by flow cytometry following tissue processing and staining (data shown as a percent of live cells, combined from two independent experiments, n=8). \* = p value < 0.05, \*\* = p value < 0.01, \*\*\* = p value < 0.001 by Welch's unequal variance *t*-test (C). NS = not significant. Error bars shown represent S.E.M.

**Supplementary Figure 3: Assessment of Th2 Cytokines and measurement of eosinophil progenitors.**

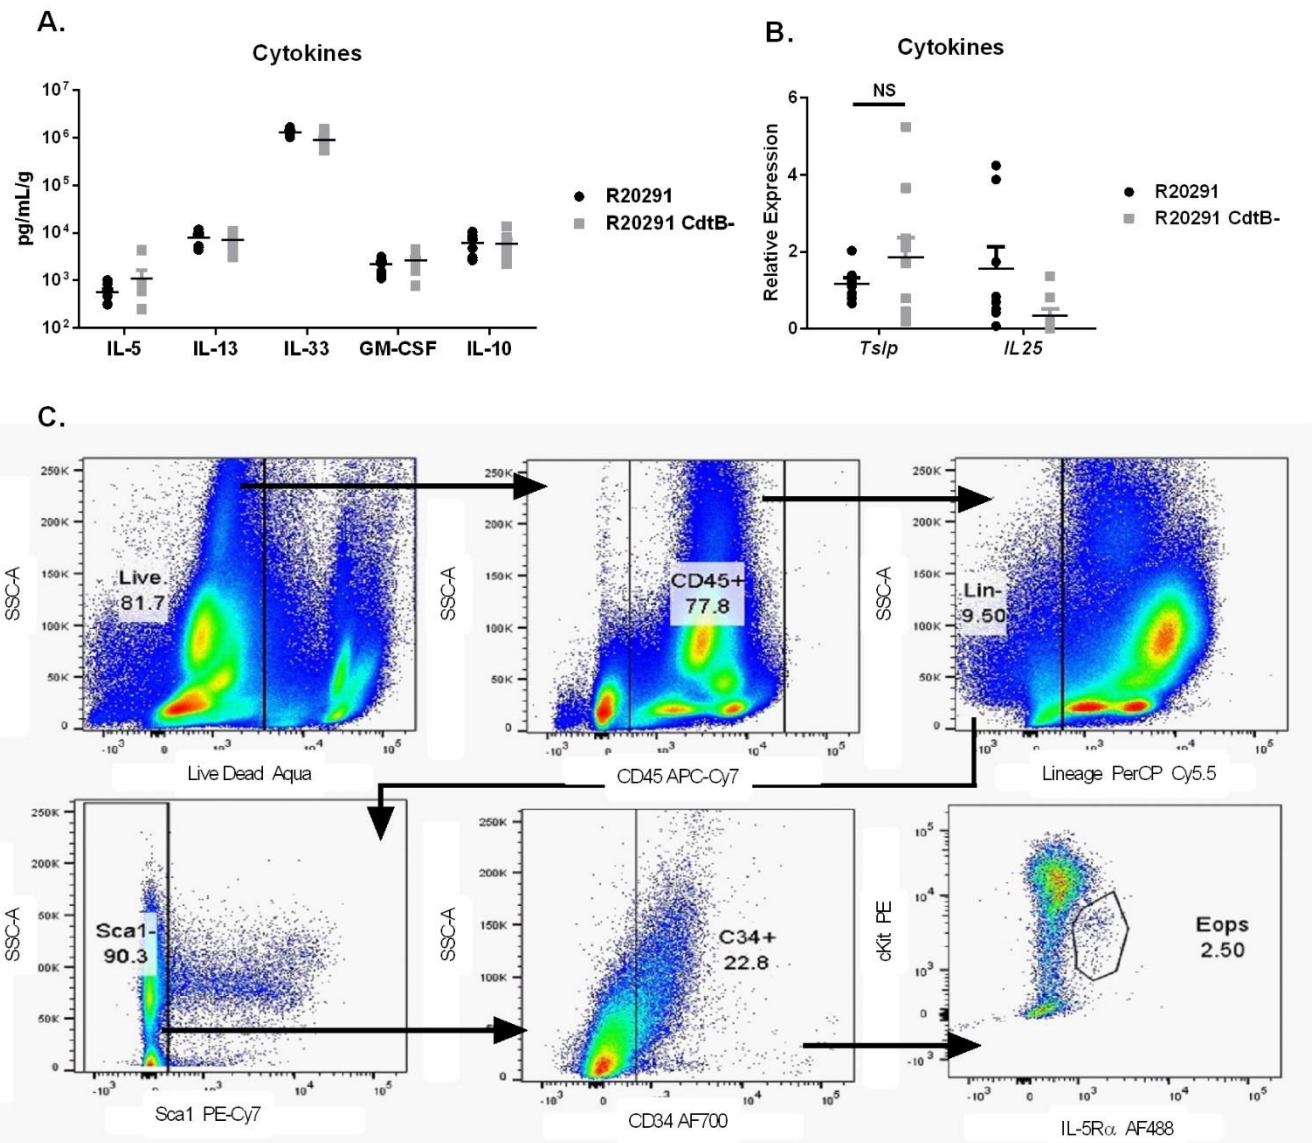

(A) Mice were sacrificed on day 3 of infection and cecal cytokines assessed in total cecal lysate by Luminex (IL-5, IL-13) or ELISA (IL-33, GM-CSF, IL-10). Values are shown normalized to total protein concentration, and are combined from two independent experiments (n=7). (B) Gene expression in total cecal RNA from mice on day 3 post-infection was quantified by qRT-PCR and shown normalized to GAPDH as a housekeeping gene, data shown combined from two

independent experiments, (n=7). **(C)** Eosinophil progenitors (Eops) were identified as Lin- CD34+ Sca-1- IL-5R $\alpha$ + cKit<sup>in</sup> cells by flow cytometry (data shown are representative of 2 independent experiments, n=6). Lineage gate consisted of TCR $\beta$ , CD3 $\epsilon$ , CD49b, B220, GR1, CD11b and CD11c on the PerCP Cy5.5 channel. Data shown are representative of two independent experiments. P values determined by Mann-Whitney test (**A**, **B**). NS = not significant. Error bars shown represent S.E.M.

**Supplementary Figure 4: Generation of bone marrow-derived eosinophils.**

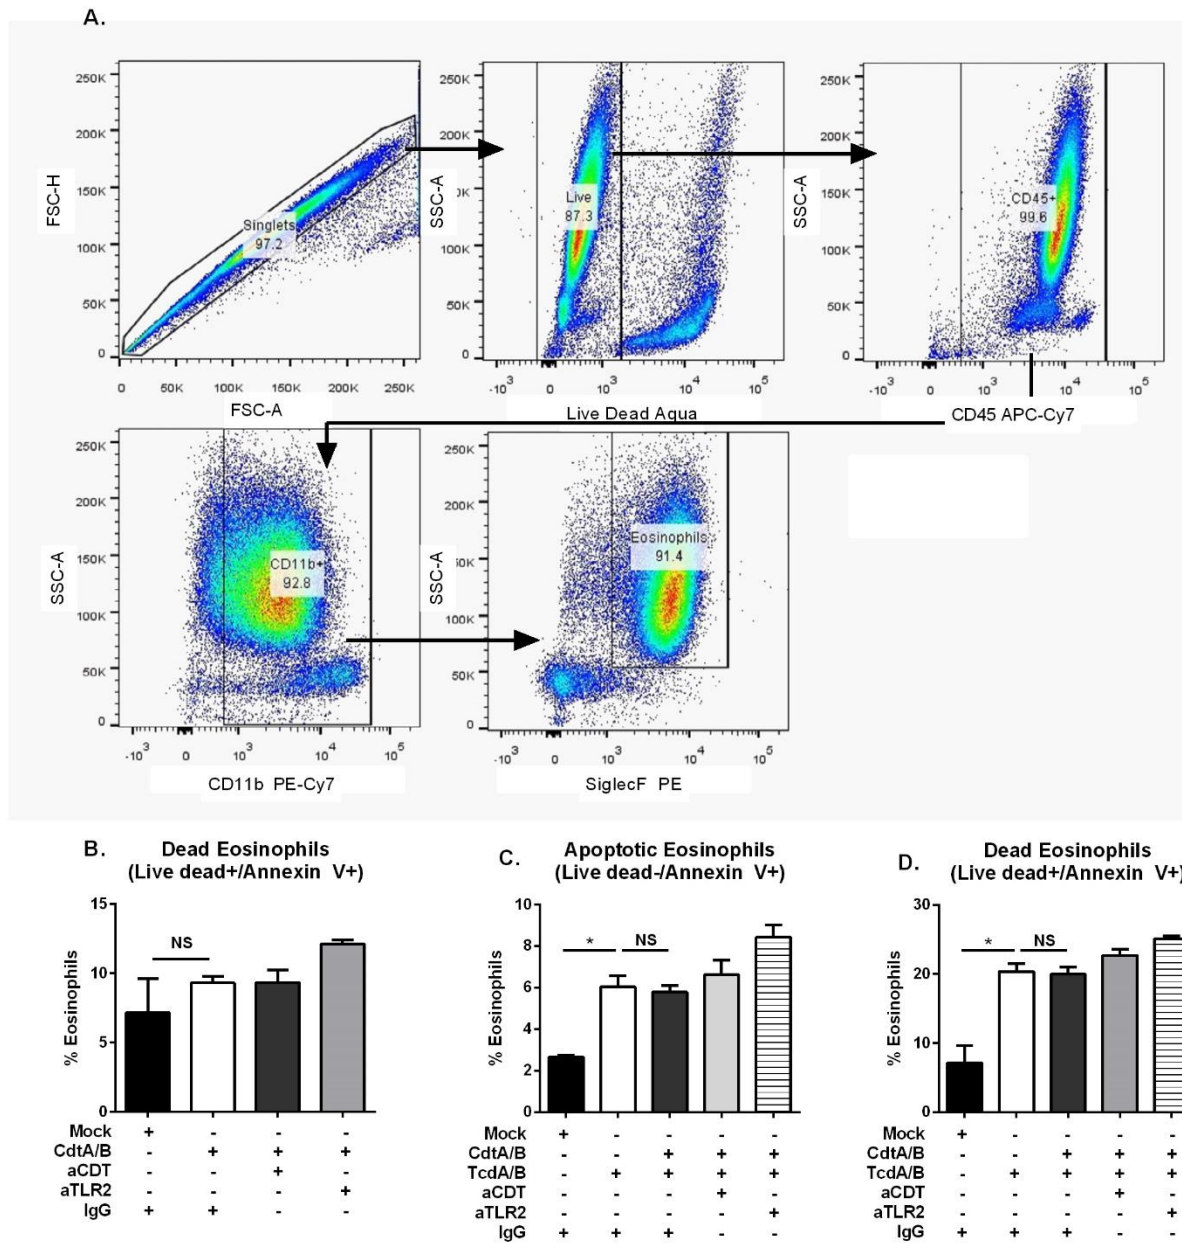

(A) Total bone marrow was harvested from C57BL/6 knockout mice and frozen in Fetal Bovine Serum with 10% DMSO until use. Thawed cells were grown in the presence of 100 ng/mL FLT3L and 100 ng/mL SCF for 4 days. The media was then removed and fresh media, supplemented with 10 ng/mL IL-5 was added. The cells were grown an additional 6 days, with fresh media added



every other day. Purity of the culture was assessed by flow cytometry on day 10. Eosinophils were identified as Live, CD45<sup>+</sup>, CD11b<sup>+</sup>, SiglecF<sup>+</sup> SSC<sup>hi</sup> cells. Data shown are representative of two independent experiments. **(B)** BM Eos were incubated for 8 hours with 200 ng/mL CDTa and 200 ng/mL CDTb in the presence or absence of anti-TLR2 neutralizing antibody (aTLR2) or anti-CDT neutralizing nanobody (aCDT). Eosinophils were stained with Live dead or Annexin V and cell death was assessed by flow cytometry, data shown are representative of 3 independent experiments assayed in duplicate. **(C-D)** BM Eos were incubated for 8 hours with 200 ng/mL CDTa and 200 ng/mL CDTb and 2ng/mL Toxin A and 2 ng/mL Toxin B. Eosinophils were stained with Live dead or Annexin V and cell death was assessed by flow cytometry, data shown are representative of 3 independent experiments assayed in duplicate \* = p value < 0.05 by Mann-Whitney test. NS = not significant. Error bars shown represent S.E.M.

**Supplementary Figure 5: Complementation of CDT in strain M7404.**

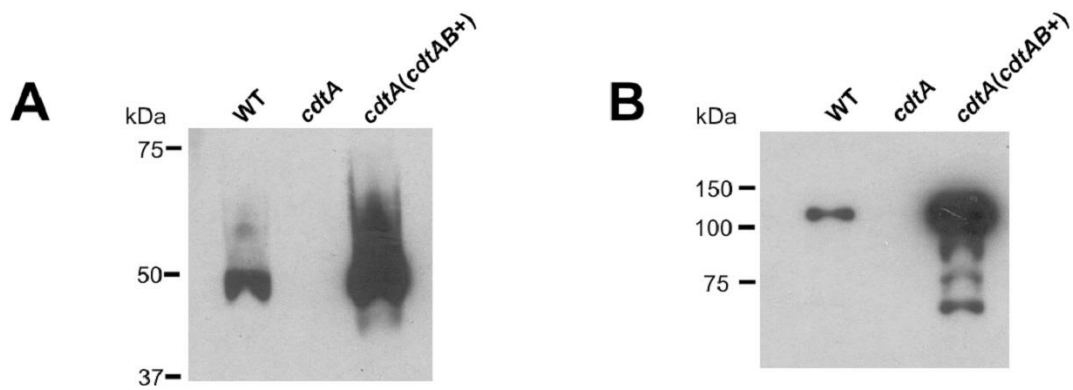

Western blot of concentrated supernatant from *C. difficile* strains M7404 (WT), M7404 CdtA- (*cdtA*), and M7404 CdtAComp (*cdtA(cdtAB+)*). Blots were probed with CDTa-specific antibody (A) or an antibody recognizing *Clostridium perfringens* Ib which cross-reacts with CDTb (B).

**Supplementary Table 1: Antibodies used for Flow Cytometry.**

| <b><u>Fluorochrome</u></b> | <b><u>Antibody</u></b> | <b><u>Source</u></b> | <b><u>Clone</u></b> |
|----------------------------|------------------------|----------------------|---------------------|
| Brilliant Violet 421       | CD11c                  | BioLegend            | N418                |
| AlexaFluor 488             | CD125/IL-5R $\alpha$   | BD Biosciences       | T21                 |
| PE                         | SiglecF                | BD Pharmingen        | E50-2440            |
| PeCy7                      | CD11B                  | BioLegend            | M1/70               |
| APC-CY7                    | CD45                   | BioLegend            | 30-F11              |
| AlexaFluor 647             | CD193/CCR3             | BD Biosciences       | 83103               |
| PerCP-Cy5.5                | Gr1                    | BioLegend            | RB6-8C5             |
| AlexaFluor 488             | Annexin V              | Life Technologies    |                     |
| PE                         | c-Kit/CD117            | BioLegend            | 2B8                 |
| AlexaFluor 700             | CD34                   | BD Biosciences       | RAM34               |
| PeCy7                      | Sca-1                  | BioLegend            | D7                  |
| PerCP-Cy5.5                | TCR $\beta$            | BioLegend            | H57-597             |
| PerCP-Cy5.5                | CD3 $\epsilon$         | BioLegend            | 17A2                |
| PerCP-Cy5.5                | CD49b                  | BioLegend            | DX5                 |
| PerCP-Cy5.5                | B220                   | BioLegend            | RA3-6B2             |
| PerCP-Cy5.5                | CD11c                  | BioLegend            | N418                |
| PerCP-Cy5.5                | CD11b                  | BioLegend            | M1/70               |
| FITC                       | LY6C                   | BD Biosciences       | AL-21               |
| PE-CY7                     | LY6G                   | BD Biosciences       | 1A8                 |
